# Supplementary figures and images for: Adsorption Capacity of Silica SBA-15 and Titanosilicate ETS-10 toward Indium Ions
Source: MDPI journal article supplement (doi:10.3390/ma16083201), 2023-04-18

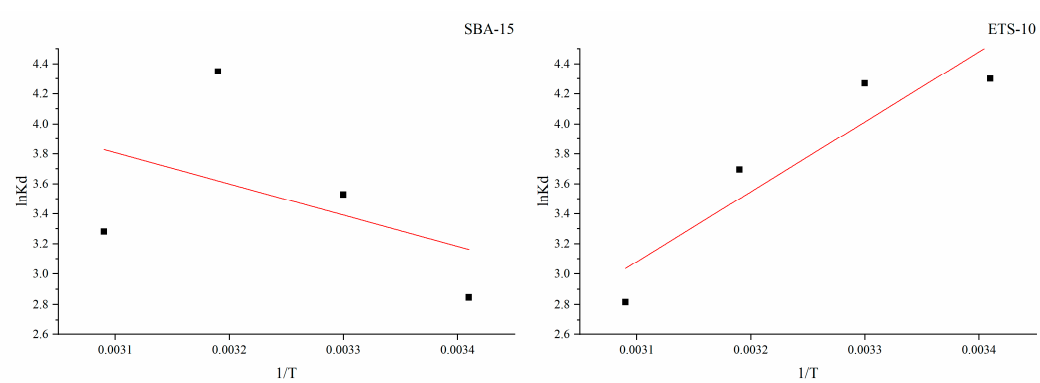

**Figure S1.** Plot of  $\ln K_d$  versus  $1/T$  for silica SBA-15 and titanosilicate ETS-10.

Supplement: s1 [file s1]
